# Supplementary material for: The impact of BNT162b2 mRNA vaccine on adaptive and innate immune responses
Source: bioRxiv or medRxiv preprint supplement (doi:10.1101/2021.05.03.21256520), 2023-03-27
Supplement: Supplementary file [file media-1.pdf]

## Supplemental Information titles and legends

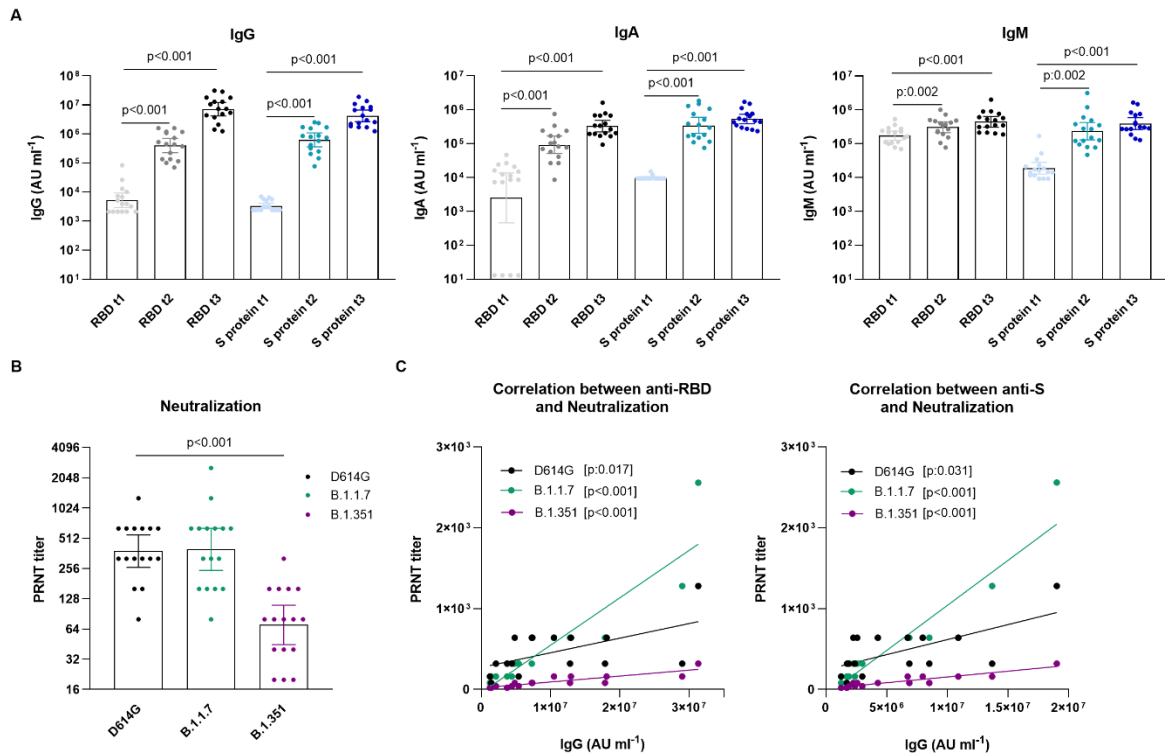

**Figure S1. Humoral response before and after BNT162b2 vaccination.** (A) Specific antibody responses to SARS-CoV-2 proteins at baseline (t1), after first vaccination (t2), and after second vaccination (t3) from sera of the subjects. Wilcoxon's matched-pairs signed-rank test, the data are presented as antibody concentration  $\pm$  geometric mean with 95% CI. (B) Neutralization assay for different variants compared to WT performed with sera at t3. Kruskal-Wallis test followed by Dunnett's multiple comparison. (C) Correlation between neutralization and specific IgG responses to SARS-CoV-2 proteins measured at t3. Spearman correlation coefficients ( $r$ ) for neutralization vs RBD-specific IgG are 0.593, 0.963 and 0.909 for D614G, B.1.1.7 and B.1.351 respectively. Spearman correlation coefficients ( $r$ ) for neutralization vs S protein-specific IgG are 0.543, 0.952 and 0.894 for D614G, B.1.1.7 and B.1.351 respectively.  $n=16$ ,  $p$ -values are depicted in the figures.

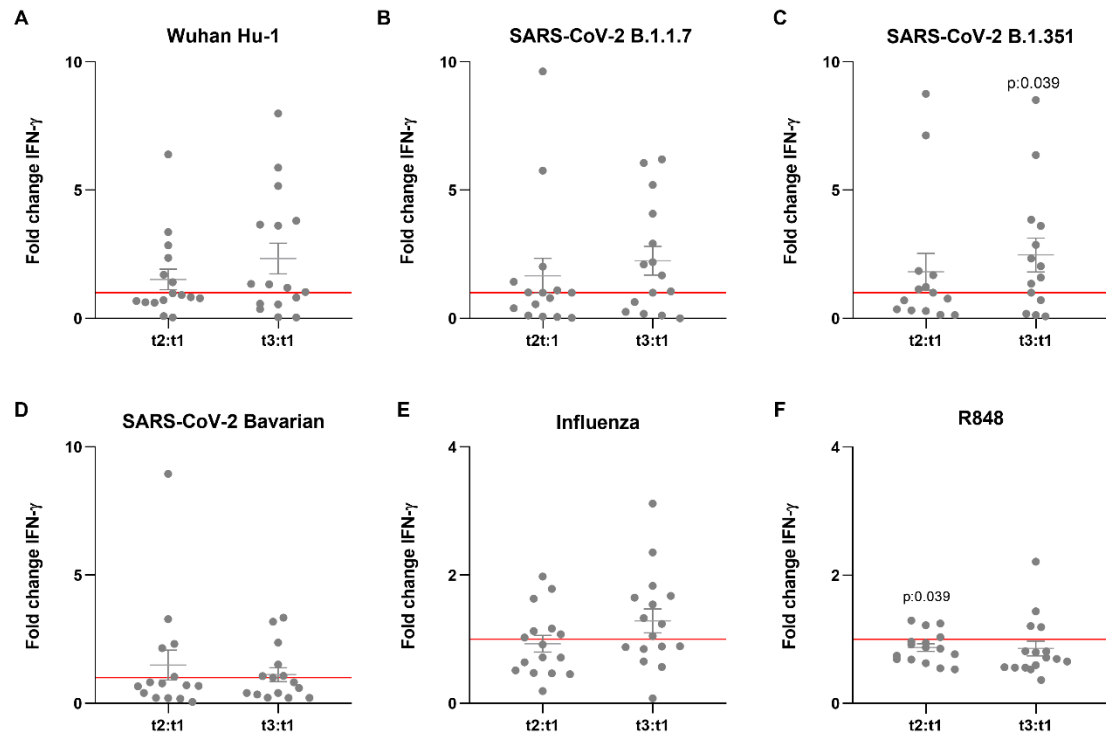

Figure S2. Specific IFN- $\gamma$  responses after stimulation with various SARS-CoV-2 variants and viral stimuli in PBMCs isolated from vaccinated subjects. (A-F) Fold change values are calculated individually for each subject by division of t2:t1 and t3:t1. IFN- $\gamma$  production is quantified from supernatants of PBMCs after 7 days stimulation by ELISA. The data is presented as fold changes  $\pm$  SEM (n=14-16) and analysed by Wilcoxon's matched-pairs signed-rank test comparing each fold change to t1=1 (red line).

Table S1. Patient characteristics

| <b>Demographic</b>                               |            |
|--------------------------------------------------|------------|
| Age, years                                       | 39.31±11.3 |
| Female, n (%)                                    | 9 (56.3)   |
| Weight, kg                                       | 69.63±7.54 |
| Height, cm                                       | 176.4±9.30 |
| Body mass index, kg/m <sup>2</sup>               | 22.59±2.47 |
| Smoker, current, n                               | 0          |
| Smoker, ever, n (%)                              | 2 (12.5)   |
| <b>Vaccination history in the past 12 months</b> |            |
| Influenza, n (%)                                 | 16 (100)   |
| BCG, n (%)                                       | 9 (56.3)   |
| Hepatitis B booster, n (%)                       | 1 (6.25)   |
| <b>Comorbidities</b>                             |            |
| None, n (%)                                      | 15 (93.75) |
| Asthma, n (%)                                    | 1 (6.25)   |
| <b>Medication use</b>                            |            |
| None, n (%)                                      | 14 (87.5)  |
| Statins, n (%)                                   | 1 (6.25)   |
| Inhaled corticosteroids, n (%)                   | 1 (6.25)   |

\*Values are expressed as mean ± SD, unless stated otherwise

Table S2. Absolute concentrations of cytokine production before and after vaccination.

| Cytokine      | Time<br>Stimuli    | t1<br>(baseline)     | t2<br>(3 weeks after 1 <sup>st</sup><br>dose) | t3<br>(2 weeks after 2 <sup>nd</sup><br>dose) |
|---------------|--------------------|----------------------|-----------------------------------------------|-----------------------------------------------|
|               |                    |                      |                                               |                                               |
| TNF- $\alpha$ | RPMI               | 821.8 $\pm$ 218.8    | 595.2 $\pm$ 117.8                             | 590.9 $\pm$ 204.6                             |
|               | Poly I:C           | 1364.8 $\pm$ 317     | 1358.3 $\pm$ 304                              | 944.2 $\pm$ 411                               |
|               | R848               | 22065.3 $\pm$ 1995   | 20871.7 $\pm$ 2294.6                          | 16555 $\pm$ 1516.4                            |
|               | Influenza          | 2165 $\pm$ 551.2     | 2164.8 $\pm$ 565                              | 2013 $\pm$ 431.3                              |
|               | Wuhan Hu-1         | 1197.6 $\pm$ 373     | 1638 $\pm$ 430.6                              | 1445.2 $\pm$ 460.8                            |
|               | LPS                | 8801 $\pm$ 1057      | 9196.2 $\pm$ 988.5                            | 8538 $\pm$ 1228                               |
|               | <i>C. albicans</i> | 5194 $\pm$ 830.4     | 5710 $\pm$ 617                                | 4558 $\pm$ 593.8                              |
| IL-1 $\beta$  | RPMI               | 200.1 $\pm$ 38.4     | 144 $\pm$ 26.6                                | 131.2 $\pm$ 24                                |
|               | Poly I:C           | 471.8 $\pm$ 90.5     | 478.2 $\pm$ 84.6                              | 234.1 $\pm$ 47.8                              |
|               | R848               | 10122.4 $\pm$ 1101   | 9768 $\pm$ 1019                               | 8462.7 $\pm$ 870.7                            |
|               | Influenza          | 469.7 $\pm$ 104      | 456.6 $\pm$ 132.5                             | 439.6 $\pm$ 79                                |
|               | Wuhan Hu-1         | 352.8 $\pm$ 109.2    | 310.6 $\pm$ 83.7                              | 306.2 $\pm$ 80.2                              |
|               | LPS                | 5932.8 $\pm$ 623.2   | 5822 $\pm$ 575.9                              | 5668.4 $\pm$ 644.7                            |
|               | <i>C. albicans</i> | 2376.7 $\pm$ 282.7   | 2789.3 $\pm$ 211.2                            | 2591.2 $\pm$ 274                              |
| IL-1Ra        | RPMI               | 5652 $\pm$ 380.7     | 5128 $\pm$ 250.5                              | 5093.3 $\pm$ 328.1979                         |
|               | Poly I:C           | 20382.5 $\pm$ 1088.2 | 21214 $\pm$ 1555.4                            | 18082 $\pm$ 1614.8                            |
|               | R848               | 18409 $\pm$ 1045.8   | 20474.2 $\pm$ 1340.5                          | 15346.1 $\pm$ 1153.2                          |
|               | Influenza          | 13626.6 $\pm$ 989.6  | 14740.3 $\pm$ 1667                            | 13758.6 $\pm$ 1472                            |
|               | Wuhan Hu-1         | 8709 $\pm$ 728       | 7864,6 $\pm$ 663                              | 7405.6 $\pm$ 1013.2                           |
|               | LPS                | 18913.6 $\pm$ 2072.7 | 21595.7 $\pm$ 3141                            | 14127.4 $\pm$ 1678.4                          |
|               | <i>C. albicans</i> | 18054.6 $\pm$ 1537.8 | 17147.7 $\pm$ 1899.3                          | 14163.7 $\pm$ 1341.5                          |
|               | RPMI               | 1963.8 $\pm$ 419.3   | 1376.4 $\pm$ 317.3                            | 2071.4 $\pm$ 595.1                            |

|               |            |                      |                      |                     |
|---------------|------------|----------------------|----------------------|---------------------|
| IFN- $\gamma$ | R848       | 30589.4 $\pm$ 3310.7 | 26326.5 $\pm$ 3225.2 | 23663,2 $\pm$ 2699  |
|               | Influenza  | 5297.1 $\pm$ 1315.7  | 3979.2 $\pm$ 670     | 5031.1 $\pm$ 915.4  |
|               | Wuhan Hu-1 | 1423.2 $\pm$ 214.7   | 1686.2 $\pm$ 301.9   | 3014 $\pm$ 825.2    |
|               | B.1.1.7    | 3598.4 $\pm$ 1824    | 1093.5 $\pm$ 286.5   | 2356 $\pm$ 898.8    |
|               | B.1.351    | 2173 $\pm$ 458.5     | 2722 $\pm$ 1166.6    | 5001.7 $\pm$ 1955.5 |
|               | Bavarian   | 3189.2 $\pm$ 682.8   | 4161 $\pm$ 1834      | 3110.8 $\pm$ 815.7  |

\*Data are presented as Mean  $\pm$  SEM (n=14-16)
